# Supplementary material for: Phenome-wide association network demonstrates close connection with individual disease trajectories from the HUNT study
Source: bioRxiv or medRxiv preprint supplement (doi:10.1101/2022.07.18.22277775), 2022-07-19
Supplement: Supplementary file [file media-2.pdf]

Tab. S1: Number of diseases that are significantly diagnosed first or last from each category. From a total of  $n$  such diseases (first or last),  $x$  are observed from each category among the  $m$  diseases of that category and  $N - m$  diseases not from that category in the HUNT sub-PheNet of  $N$  diseases. A hypergeometric test with variables  $x, m, N - m$  and  $n$  are used to test if the observed values are greater than expected,  $P(X \geq x)$ , or less than expected,  $P(X \leq x)$ , where the  $p$ -values are Bonferroni adjusted with 16 tests, where  $p$ -values less than 0.025 are marked with a star.

| Category              | Diseases diagnosed first |     |         |               |               | Diseases diagnosed last |     |         |               |               |
|-----------------------|--------------------------|-----|---------|---------------|---------------|-------------------------|-----|---------|---------------|---------------|
|                       | $x$                      | $m$ | $N - m$ | $P(X \geq x)$ | $P(X \leq x)$ | $x$                     | $m$ | $N - m$ | $P(X \geq x)$ | $P(X \leq x)$ |
| circulatory system    | 18                       | 54  | 305     | 0.0214*       | 1             | 20                      | 54  | 305     | 0.0355        | 1             |
| congenital anomalies  | 1                        | 1   | 358     | 1             | 1             | 1                       | 1   | 358     | 1             | 1             |
| dermatologic          | 2                        | 15  | 344     | 1             | 1             | 1                       | 15  | 344     | 1             | 1             |
| digestive             | 3                        | 35  | 324     | 1             | 1             | 4                       | 35  | 324     | 1             | 1             |
| endocrine/metabolic   | 7                        | 30  | 329     | 1             | 1             | 10                      | 30  | 329     | 1             | 1             |
| genitourinary         | 4                        | 33  | 326     | 1             | 1             | 9                       | 33  | 326     | 1             | 1             |
| hematopoietic         | 1                        | 21  | 338     | 1             | 1             | 2                       | 21  | 338     | 1             | 1             |
| infectious diseases   | 0                        | 2   | 357     | 1             | 1             | 0                       | 2   | 357     | 1             | 1             |
| injuries & poisonings | 0                        | 3   | 356     | 1             | 1             | 1                       | 3   | 356     | 1             | 1             |
| mental disorders      | 3                        | 22  | 337     | 1             | 1             | 3                       | 22  | 337     | 1             | 1             |
| musculoskeletal       | 9                        | 28  | 331     | 0.5521        | 1             | 9                       | 28  | 331     | 1             | 1             |
| neoplasms             | 5                        | 55  | 304     | 1             | 0.8688        | 3                       | 55  | 304     | 1             | 0.0122*       |
| neurological          | 3                        | 15  | 344     | 1             | 1             | 2                       | 15  | 344     | 1             | 1             |
| respiratory           | 4                        | 17  | 342     | 1             | 1             | 4                       | 17  | 342     | 1             | 1             |
| sense organs          | 2                        | 17  | 342     | 1             | 1             | 1                       | 17  | 342     | 1             | 1             |
| symptoms              | 0                        | 11  | 348     | 1             | 1             | 5                       | 11  | 348     | 0.9061        | 1             |
| $n$                   | 62                       |     |         |               |               | 75                      |     |         |               |               |
| $N$                   | 359                      |     |         |               |               | 359                     |     |         |               |               |
